# Supplementary material
Source: publisher figshare collection journal article supplement (https://acs.figshare.com/ndownloader/files/5118742)
Supplement: Supplementary file 1 [file 5118742]

## Supporting Information 1

### Allylic Etherification Via Ir(I)/Zn(II) Bimetallic Catalysis

Justin Roberts and Chulbom Lee\*

*Department of Chemistry, Princeton University  
Princeton, New Jersey 08544*

**General.** Unless otherwise noted, all reactions were conducted in flame-dried glassware under an argon atmosphere using anhydrous solvents (passed through an activated alumina column). Commercially available reagents were used without further purification.  $^1\text{H}$  and  $^{13}\text{C}$  NMR spectra were recorded on a Varian Mercury 300 MHz or a Varian Inova 400 MHz spectrometer. Infrared (IR) spectra were recorded on a Nicolet 730 or a Perkin-Elmer Paragon 500 FT-IR spectrometer. High resolution mass spectra (HRMS) were obtained from the UCR Mass Spectrometry Facility, the Princeton University Mass Spectrometry Facility or the Scripps Research Institute Mass Spectrometry Facility.

#### Procedure for allylic etherification using stoichiometric $\text{Et}_2\text{Zn}$ (Method A).

To a solution of carbonate **1a** (100 mg, 0.50 mmol) and benzyl alcohol (**2a**, 60 mg, 0.55 mmol) in THF (0.25 mL) was added dropwise  $\text{Et}_2\text{Zn}$  (0.28 mL, 0.28 mmol, 1.0 M in hexane) via a syringe at 25 °C. The resulting mixture was stirred for 15 min during which time it turned a cloudy white and became viscous. To this suspension was added  $\text{NH}_4\text{I}$  (73 mg, 0.50 mmol). After stirring for 15 min, the solution became more heterogeneous. In a separate test tube was prepared a solution of  $[\text{Ir}(\text{COD})\text{Cl}]_2$  (8.4 mg, 0.012 mmol) and pyridine (2.3  $\mu\text{L}$ , 0.025 mmol) in THF (0.25 mL). This solution was then added via syringe to the flask containing substrates. After stirring for 5 min, the reaction was diluted with diethyl ether (20 mL) and washed with saturated  $\text{NH}_4\text{Cl}$  aqueous solution (5 mL). The aqueous layer was extracted with additional diethyl ether (10 mL). The combined organic layers were dried over  $\text{MgSO}_4$ , filtered, concentrated and purified by flash column chromatography eluting with a mixture of hexanes and diethyl ether (40:1) to give benzyl ether **3aa** (91 mg, 96%) as a colorless oil.

#### Procedure for allylic etherification using catalytic $\text{Et}_2\text{Zn}$ (Method B).

To a solution of L-tryptophan (4.1 mg, 0.020 mmol) and  $\text{NH}_4\text{I}$  (2.9 mg, 0.020 mmol) in THF (0.05 mL) was added dropwise  $\text{Et}_2\text{Zn}$  (20  $\mu\text{L}$ , 0.020 mmol, 1.0 M in hexane) via a syringe at 25 °C. The resulting mixture was stirred for 15 min during which time it turned cloudy white. To this suspension were added carbonate **1a** (40 mg, 0.20 mmol) and benzyl alcohol (**2a**, 32 mg, 0.30 mmol) in THF (0.1 mL) via a syringe at 25 °C. This mixture was allowed to stir for 5 min at which time a solution of  $[\text{Ir}(\text{COD})\text{Cl}]_2$  (3.4 mg, 0.0051 mmol) and pyridine (0.9  $\mu\text{L}$ , 0.01 mmol) in THF (0.05 mL) was added via syringe 25 °C. After stirring for 15 min, the reaction was diluted with diethyl ether (20 mL) and washed with saturated  $\text{NH}_4\text{Cl}$  aqueous solution (5 mL). The aqueous layer was extracted with an additional diethyl ether (10 mL). The combined organic layers were dried over  $\text{MgSO}_4$ , filtered, concentrated, and purified by flash column

chromatography eluting with a mixture of hexanes and diethyl ether (40:1) to give benzyl ether **3aa** (34 mg, 89%) as a colorless oil.

### Allylic etherification of the linear substrate **7** (Scheme 1).

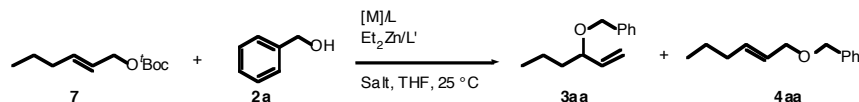

Following method A, carbonate **7** (100 mg, 0.50 mmol), benzyl alcohol (**2a**, 60 mg, 0.55 mmol), [Ir(COD)Cl]<sub>2</sub> (8.4 mg, 0.012 mmol), pyridine (2.3  $\mu$ L, 0.025 mmol), Et<sub>2</sub>Zn (1.0 M in hexanes, 0.28 mL, 0.28 mmol) and NH<sub>4</sub>I (72 mg, 0.50 mmol) were reacted in THF (0.5 mL, 1.0 M) to afford a 1:9 mixture of inseparable ethers **3aa** and **4aa** (66 mg, 0.35 mmol, 70%) as a clear, colorless oil after column chromatography (hexanes:diethyl ether = 40:1). Following the literature procedure,<sup>1</sup> carbonate **7** (100 mg, 0.50 mmol), benzyl alcohol (**2a**, 60 mg, 0.55 mmol) and Et<sub>2</sub>Zn (1.0 M in hexanes, 0.28 mL, 0.028 mmol) were reacted in THF (0.50 mL, 1.0 M) in the presence of Pd(PPh<sub>3</sub>)<sub>4</sub> (29 mg, 0.025 mmol) to afford **4aa**<sup>2</sup> (36 mg, 0.19 mmol, 38%) exclusively as a clear, colorless oil.

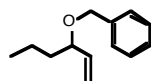

**3-Benzyloxy-1-hexene (3aa).** Following method A, **1a** (100 mg, 0.50 mmol), **2a** (60 mg, 0.55 mmol), [Ir(COD)Cl]<sub>2</sub> (8.4 mg, 0.012 mmol), pyridine (2.3  $\mu$ L, 0.025 mmol), Et<sub>2</sub>Zn (1.0 M in hexanes, 0.28 mL, 0.28 mmol) and NH<sub>4</sub>I (72 mg, 0.50 mmol) were reacted in THF (0.5 mL, 1.0 M) to afford **3aa** (91 mg, 0.48 mmol, 96%) as a clear, colorless oil after column chromatography (hexanes:diethyl ether = 40:1). Following method B, **1a** (40 mg, 0.20 mmol), **2a** (32 mg, 0.30 mmol), [Ir(COD)Cl]<sub>2</sub> (3.4 mg, 0.0051 mmol), pyridine (0.90  $\mu$ L, 0.010 mmol), Et<sub>2</sub>Zn (1.0 M in hexanes, 20  $\mu$ L, 0.020 mmol), L-tryptophan (4.1 mg, 0.020 mmol) and NH<sub>4</sub>I (2.9 mg, 0.020 mmol) were reacted in THF (0.20 mL, 1.0 M) to afford **3aa** (34 mg, 0.18 mmol, 89%). IR (film) 2959, 2933, 2871, 1096, 1070, 697 cm<sup>-1</sup>; <sup>1</sup>H NMR (300 MHz, CDCl<sub>3</sub>)  $\delta$  7.20-7.40 (m, 5H), 5.75 (ddd, J = 8.8, 6.7, 1.8 Hz, 1H), 5.25 (d, J = 1.8 Hz, 1H), 5.24 (d, J = 8.8 Hz, 1H), 4.62 (d, J = 12.1 Hz, 1H), 4.37 (d, J = 12.1 Hz, 1H), 3.75 (q, J = 6.7 Hz, 1H), 1.20-1.80 (m, 4H), 0.91 (t, J = 6.4 Hz, 3H); <sup>13</sup>C NMR (75 MHz, CDCl<sub>3</sub>)  $\delta$  139.5, 139.1, 128.5, 128.0, 117.2, 80.6, 70.3, 37.9, 18.9, 14.3; HRMS (EI-MS) Calcd for C<sub>13</sub>H<sub>18</sub>O [M<sup>+</sup>] 190.1358, Found 190.1358.

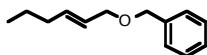

**(E)-1-Benzyloxy-2-hexene (4aa).** <sup>1</sup>H NMR (300 MHz, CDCl<sub>3</sub>)  $\delta$  7.26-7.43 (m, 5H), 5.56-5.77 (m, 2H), 4.51 (s, 2H), 3.98 (dd, J = 6.7, 0.7 Hz, 2H), 2.04 (q, J = 7.2 Hz, 2H), 1.20-1.75 (m, 2H), 0.91 (t, J = 7.0 Hz, 3H); <sup>13</sup>C NMR (75 MHz, CDCl<sub>3</sub>)  $\delta$  138.4, 134.8, 128.3, 127.7, 127.4, 126.2, 71.7, 70.9, 34.3, 22.2, 13.6.

<sup>1</sup> Kim, H.; Lee, C. *Org. Lett.* **2002**, *4*, 4369.

<sup>2</sup> Crich, D.; Beckwith, A. L. J.; Chen, C.; Yao, Q.; Davison, I. G. E.; Longmore, R. W.; Anaya de Parrodi, C.; Quinter-Cortes, L.; Sandoval-Ramirez, J. *J. Am. Chem. Soc.* **1995**, *117*, 8757.

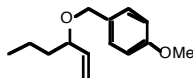

**3-(4-Methoxybenzyloxy)-1-hexene (3ab).** Following method A, **1a** (100 mg, 0.50 mmol), **2b** (76 mg, 0.55 mmol),  $[\text{Ir}(\text{COD})\text{Cl}]_2$  (8.4 mg, 0.012 mmol), pyridine (2.6  $\mu\text{L}$ , 0.025 mmol),  $\text{Et}_2\text{Zn}$  (1.0 M in hexanes, 0.28 mL, 0.28 mmol) and  $\text{NH}_4\text{I}$  (72 mg, 0.50 mmol) were reacted in THF (0.5 mL, 1.0 M) to afford **3ab** (85 mg, 0.38 mmol, 77%) as a clear, light yellow oil after column chromatography (hexanes:diethyl ether = 30:1). Following method B, **1a** (100 mg, 0.50 mmol), **2b** (104 mg, 0.75 mmol),  $[\text{Ir}(\text{COD})\text{Cl}]_2$  (8.4 mg, 0.012 mmol), pyridine (2.6  $\mu\text{L}$ , 0.025 mmol),  $\text{Et}_2\text{Zn}$  (1.0 M in hexanes, 50  $\mu\text{L}$ , 0.50 mmol), L-tryptophan (10 mg, 0.50 mmol) and  $\text{NH}_4\text{I}$  (7.2 mg, 0.050 mmol) were reacted in THF (0.50 mL, 1.0 M) to afford **3ab** (72 mg, 0.33 mmol, 66%). IR (film) 2958, 2934, 2871, 1514, 1248, 1038  $\text{cm}^{-1}$ ;  $^1\text{H}$  NMR (300 MHz,  $\text{CDCl}_3$ )  $\delta$  7.26 (d,  $J$  = 8.3 Hz, 2H), 6.88 (d,  $J$  = 8.3 Hz, 2H), 5.74 (ddd,  $J$  = 18.4, 10.0, 6.8 Hz, 1H), 5.21 (d,  $J$  = 10.0 Hz, 1H), 5.20 (d,  $J$  = 18.4 Hz, 1H), 4.53 (d,  $J$  = 11.5 Hz, 3.80 (s, 3H), 3.72 (q,  $J$  = 6.8 Hz, 1H), 1.20-1.75 (m, 4H), 0.89 (t,  $J$  = 7.0 Hz, 3H);  $^{13}\text{C}$  NMR (75 MHz,  $\text{CDCl}_3$ )  $\delta$  159.2, 139.6, 131.2, 129.6, 117.1, 113.9, 80.3, 69.9, 55.5, 37.9, 18.9, 14.2; HRMS (EI-MS) Calcd for  $\text{C}_{14}\text{H}_{20}\text{O}_2$   $[\text{M}^+]$  220.1463, Found 220.1463.

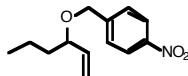

**3-(4-Nitrobenzyloxy)-1-hexene (3ac).** Following method A, **1a** (100 mg, 0.50 mmol), **2c** (84 mg, 0.55 mmol),  $[\text{Ir}(\text{COD})\text{Cl}]_2$  (8.4 mg, 0.012 mmol), pyridine (2.6  $\mu\text{L}$ , 0.025 mmol),  $\text{Et}_2\text{Zn}$  (1.0 M in hexanes, 0.28 mL, 0.28 mmol) and  $\text{NH}_4\text{I}$  (72 mg, 0.50 mmol) were reacted in THF (0.50 mL, 1.0 M) to afford **3ac** (73 mg, 0.31 mmol, 62%) as a clear, yellow oil after column chromatography (hexanes:diethyl ether = 30:1). Following method B, **1a** (100 mg, 0.50 mmol), **2c** (110 mg, 0.75 mmol),  $[\text{Ir}(\text{COD})\text{Cl}]_2$  (8.4 mg, 0.012 mmol), pyridine (2.6  $\mu\text{L}$ , 0.025 mmol),  $\text{Et}_2\text{Zn}$  (1.0 M in hexanes, 50  $\mu\text{L}$ , 0.050 mmol), L-tryptophan (10 mg, 0.050 mmol) and  $\text{NH}_4\text{I}$  (7.3 mg, 0.050 mmol) were reacted in THF (0.50 mL, 1.0 M) to afford **3ac** (84 mg, 0.36 mmol, 71%). IR (film) 3080, 2960, 2934, 2872, 1735, 1606, 1521, 1459, 1422, 1347, 1319, 1097, 993, 930, 843, 738  $\text{cm}^{-1}$ ;  $^1\text{H}$  NMR (300 MHz,  $\text{CDCl}_3$ )  $\delta$  8.16 (d,  $J$  = 8.7 Hz, 2H), 7.48 (d,  $J$  = 8.2 Hz, 2H), 5.71 (ddd,  $J$  = 17.7, 10.5, 7.9 Hz, 1H), 5.24 (d,  $J$  = 10.4 Hz, 1H), 5.19 (d,  $J$  = 17.0 Hz, 1H), 4.66 (d,  $J$  = 13.4 Hz, 1H), 4.43 (d,  $J$  = 13.4 Hz, 1H), 3.74 (q,  $J$  = 6.8 Hz, 1H), 1.31-1.73 (m, 4H), 0.90 (t,  $J$  = 7.3 Hz, 3H);  $^{13}\text{C}$  NMR (75 MHz,  $\text{CDCl}_3$ )  $\delta$  147.4, 147.0, 138.8, 127.9, 123.7, 117.8, 81.6, 69.0, 37.8, 18.8, 14.2; HRMS (FAB-MS) Calcd for  $\text{C}_{13}\text{H}_{17}\text{O}_3\text{N}$   $[\text{MH}^+]$  236.1287, Found 236.1280.

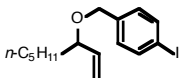

**3-(4-Iodobenzyloxy)-1-octene (3bd).** Following method A, **1b** (230 mg, 1.0 mmol), **2d** (260 mg, 1.1 mmol),  $[\text{Ir}(\text{COD})\text{Cl}]_2$  (17 mg, 0.25 mmol), pyridine (4.7  $\mu\text{L}$ , 0.050 mmol),  $\text{Et}_2\text{Zn}$  (1.0 M in hexanes, 0.55 mL, 0.55 mmol) and  $\text{NH}_4\text{I}$  (140 mg, 1.0 mmol) were reacted in THF (1.0 mL, 1.0 M) to afford **3bd** (330 mg, 0.97 mmol, 97%) as a clear, yellow oil after column chromatography (hexanes:diethyl ether = 40:1). Following method B, **1b** (57 mg, 0.25 mmol), **2d** (88 mg, 0.38 mmol),  $[\text{Ir}(\text{COD})\text{Cl}]_2$  (4.2 mg, 0.0062 mmol), pyridine (1.0  $\mu\text{L}$ , 0.012 mmol),  $\text{Et}_2\text{Zn}$  (1.0 M in hexanes, 25  $\mu\text{L}$ , 0.025 mmol), L-tryptophan (5.1 mg, 0.025 mmol) and  $\text{NH}_4\text{I}$  (3.6 mg, 0.025 mmol) were reacted in THF (0.25 mL, 1.0 M) to afford **3bd** (70 mg, 0.20 mmol,

81%).  $[\alpha]_D^{23}$  -0.288(c 1.08, CH<sub>2</sub>Cl<sub>2</sub>); IR (film) 2957, 2931, 2859, 1484, 1466, 1369, 1276, 1255, 1162, 1084, 1008, 926, 798 cm<sup>-1</sup>; <sup>1</sup>H NMR (400 MHz, CDCl<sub>3</sub>)  $\delta$  7.63 (d, J = 8.3 Hz, 2H), 7.06 (d, J = 8.2 Hz, 2H), 5.69 (ddd, J = 18.2, 10.3, 7.8 Hz, 1H), 5.20 (d, J = 10.2 Hz, 1H), 5.16 (d, J = 17.2 Hz, 1H), 4.50 (d, J = 12.2 Hz, 1H), 4.26 (d, J = 12.2 Hz, 1H), 3.66 (q, J = 6.7 Hz, 1H), 1.55-1.69 (m, 2H), 1.15-1.50 (m, 6H), 0.86 (t, J = 7.1 Hz, 3H); <sup>13</sup>C NMR (100 MHz, CDCl<sub>3</sub>)  $\delta$  139.2, 138.8, 137.6, 129.8, 117.4, 92.9, 81.0, 69.5, 35.6, 32.0, 31.0, 28.0, 25.2, 22.8, 14.3; HRMS (EI-MS) Calcd for C<sub>15</sub>H<sub>21</sub>OI [M<sup>+</sup>] 344.0637, Found 344.0621.

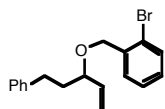

**3-(2-Bromobenzyloxy)-5-phenyl-1-pentene (3ce).** Following method A, **1c** (130 mg, 0.50 mmol), **2e** (100 mg, 0.55 mmol), [Ir(COD)Cl]<sub>2</sub> (8.4 mg, 0.012 mmol), pyridine (2.6  $\mu$ L, 0.025 mmol), Et<sub>2</sub>Zn (1.0 M in hexanes, 0.28 mL, 0.28 mmol) and NH<sub>4</sub>I (72 mg, 0.50 mmol) were reacted in THF (0.50 mL, 1.0 M) to afford **3ce** (130mg, 0.39 mmol, 78%) as a clear, yellow oil after column chromatography (hexanes:diethyl ether = 40:1). Following method B, **1c** (130 mg, 0.50 mmol), **2e** (140 mg, 0.75 mmol), [Ir(COD)Cl]<sub>2</sub> (8.4 mg, 0.012 mmol), pyridine (2.6  $\mu$ L, 0.025 mmol), Et<sub>2</sub>Zn (1.0 M in hexanes, 50  $\mu$ L, 0.050 mmol), L-tryptophan (10 mg, 0.050 mmol) and NH<sub>4</sub>I (7.3 mg, 0.050 mmol) were reacted in THF (0.50 mL, 1.0 M) to afford **3ce** (120 mg, 0.38 mmol, 75%). IR (film) 3063, 3026, 2925, 2861, 1744, 1454, 1094, 1027, 749, 699 cm<sup>-1</sup>; <sup>1</sup>H NMR (300 MHz, CDCl<sub>3</sub>)  $\delta$  7.51-7.60 (m, 2H), 7.14-7.35 (m, 7H), 5.76-5.89 (m, 1H), 5.24-5.32 (m, 2H), 4.65 (d, J = 13.0 Hz, 1H), 4.44 (d, J = 12.9 Hz, 1H), 3.83 (q, J = 5.7 Hz, 1H), 2.67-2.86 (m, 2H), 1.99-2.11 (m, 1H), 1.82-1.94 (m, 1H); <sup>13</sup>C NMR (75 MHz, CDCl<sub>3</sub>)  $\delta$  142.3, 138.8, 138.4, 132.7, 129.5, 129.0, 128.7, 128.6, 127.6, 126.0, 123.0, 117.8, 80.6, 69.8, 37.4, 31.9; HRMS (FAB-MS) Calcd for C<sub>18</sub>H<sub>19</sub>OBr [MH<sup>+</sup>] 331.0698, Found 331.0691.

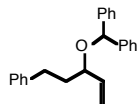

**3-Diphenylmethoxy-5-phenyl-1-pentene (3cf).** Following method A, **1c** (130 mg, 0.50 mmol), **2f** (100 mg, 0.55 mmol), [Ir(COD)Cl]<sub>2</sub> (8.4 mg, 0.012 mmol), pyridine (2.6  $\mu$ L, 0.025 mmol), Et<sub>2</sub>Zn (1.0 M in hexanes, 0.28mL, 0.28 mmol) and NH<sub>4</sub>I (72mg, 0.50 mmol) were reacted in THF (0.50 mL, 1.0 M) to afford **3cf** (65 mg, 0.20 mmol, 40%) as a clear, light yellow oil after column chromatography (hexanes:diethyl ether = 40:1). Following method B, **1c** (130 mg, 0.50 mmol), **2f** (140 mg, 0.75 mmol), [Ir(COD)Cl]<sub>2</sub> (8.4 mg, 0.012 mmol), pyridine (2.6  $\mu$ L, 0.025 mmol), Et<sub>2</sub>Zn (1.0 M in hexanes, 50  $\mu$ L, 0.050 mmol), L-tryptophan (10 mg, 0.050 mmol) and NH<sub>4</sub>I (7.3 mg, 0.050 mmol) were reacted in THF (0.5 mL, 1.0 M) to afford **3cf** (100 mg, 0.31 mmol, 61%). IR (film) 3063, 3027, 2980, 2931, 2863, 1743, 1495, 1454, 1278, 1255, 1157, 1052, 926, 742, 699 cm<sup>-1</sup>; <sup>1</sup>H NMR (300 MHz, CDCl<sub>3</sub>)  $\delta$  7.14-7.42 (m, 15H), 5.83 (ddd, J = 17.3, 10.3, 7.1 Hz, 1H), 5.54 (s, 1H), 5.28 (d, J = 10.3 Hz, 1H), 5.20 (d, J = 17.2 Hz, 1H), 3.84 (q, J = 7.0 Hz, 1H), 2.60-2.85 (m, 2H), 2.04-2.12 (m, 1H), 1.83-1.92 (m, 1H); <sup>13</sup>C NMR (75 MHz, CDCl<sub>3</sub>)  $\delta$  143.4, 142.5, 142.4, 140.4, 139.0, 128.7, 128.6, 128.5, 128.4, 128.2, 128.0, 127.8, 127.5, 127.3, 127.2, 127.0, 125.9, 118.0, 80.1, 78.1, 37.6, 31.9; HRMS (FAB-MS) Calcd for C<sub>24</sub>H<sub>24</sub>O [MNa<sup>+</sup>] 351.1725, Found 351.1711.

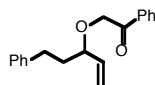

**3-(1-phenyl-1-oxo-2-ethyl)-1-pentene (3cg).** Following method A, **1c** (130 mg, 0.50 mmol), **2g** (75 mg, 0.55 mmol), [Ir(COD)Cl]<sub>2</sub> (8.4 mg, 0.012 mmol), pyridine (2.6  $\mu$ L, 0.025 mmol), Et<sub>2</sub>Zn (1.0 M in hexanes, 0.28 mL, 0.28 mmol) and NH<sub>4</sub>I (72 mg, 0.50 mmol) were reacted in THF (0.50 mL, 1.0 M) to afford **3cg** (42 mg, 0.15 mmol, 30%) as a clear, yellow oil after column chromatography (hexanes:diethyl ether = 20:1). Following method B, **1c** (130 mg, 0.50 mmol), **2g** (100 mg, 0.75 mmol), [Ir(COD)Cl]<sub>2</sub> (8.4 mg, 0.012 mmol), pyridine (2.6  $\mu$ L, 0.025 mmol), Et<sub>2</sub>Zn (1.0 M in hexanes, 50  $\mu$ L, 0.050 mmol), L-tryptophan (10 mg, 0.050 mmol) and NH<sub>4</sub>I (7.3 mg, 0.050 mmol) were reacted in THF (0.50 mL, 1.0 M) to afford **3cg** (64 mg, 0.23 mmol, 46%). IR (film) 3062, 3026, 2926, 2860, 1703, 1598, 1496, 1450, 1284, 1226, 1130, 978, 932, 754, 691 cm<sup>-1</sup>; <sup>1</sup>H NMR (300 MHz, CDCl<sub>3</sub>)  $\delta$  7.94 (d, J = 7.8 Hz, 2H), 7.58 (t, J = 6.6 Hz, 1H), 7.47 (t, J = 7.6 Hz, 2H), 7.15-7.32 (m, 5H), 5.76 (ddd, J 17.1, 10.3, 7.0 Hz, 1H), 5.28 (d, J = 10.3 Hz, 1H), 5.24 (d, J = 17.1 Hz, 1H), 4.83 (d, J = 16.7 Hz, 1H), 4.64 (d, J = 16.6 Hz, 1H), 3.83 (q, J = 7.0 Hz, 1H), 2.66-2.85 (m, 2H), 2.04-2.18 (m, 1H), 1.82-1.95 (m, 2H); <sup>13</sup>C NMR (75 MHz, CDCl<sub>3</sub>)  $\delta$  196.8, 142.2, 138.2, 135.4, 133.6, 128.9, 128.7, 128.6, 128.2, 126.0, 118.8, 81.8, 71.3, 37.1, 31.7; HRMS (FAB-MS) Calcd for C<sub>19</sub>H<sub>20</sub>O<sub>2</sub> [MH<sup>+</sup>] 281.1542, Found 281.1549.

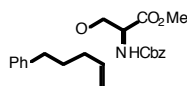

**Methyl (S)-2-benzyloxycarbonylamino-3-[(R\*S\*)-5-phenyl-1-penten-3-oxy]-propionate (3ch).** Following method A, ( $\pm$ )-**1c** (52 mg, 0.20 mmol), (*S*)-**2h** (56 mg, 0.22 mmol), [Ir(COD)Cl]<sub>2</sub> (3.4 mg, 0.0051 mmol), pyridine (0.90  $\mu$ L, 0.010 mmol), Et<sub>2</sub>Zn (1.0 M in hexanes, 0.11 mL, 0.11 mmol) and NH<sub>4</sub>I (29 mg, 0.20 mmol) were reacted in THF (0.20 mL, 1.0 M) to afford **3ch** (58 mg, 0.14 mmol, 73%) as a clear, light yellow oil after column chromatography (hexanes:ethyl acetate = 8:1). Following method B, **1c** (52 mg, 0.20 mmol), **2h** (76 mg, 0.30 mmol), [Ir(COD)Cl]<sub>2</sub> (3.4 mg, 0.0051 mmol), pyridine (0.90  $\mu$ L, 0.010 mmol), Et<sub>2</sub>Zn (1.0 M in hexanes, 20  $\mu$ L, 0.020 mmol), L-tryptophan (4.1 mg, 0.0020 mmol) and NH<sub>4</sub>I (2.9 mg, 0.0020 mmol) were reacted in THF (0.20 mL, 1.0 M) to afford **3ch** (55 mg, 0.14 mmol, 69%). IR (film) 3334, 3028, 2951, 1727, 1499, 1342, 1208, 1108, 1065, 699 cm<sup>-1</sup>; <sup>1</sup>H NMR (300 MHz, CDCl<sub>3</sub>)  $\delta$  7.17-7.37 (m, 10H), 5.54-5.71 (m, 2H), 5.09-5.25 (m, 4H), 4.50 (d, J = 7.4 Hz, 1H), 3.92 (dd, J = 9.4, 2.8 Hz, 0.5H), 3.67-3.82 (m, 4H), 3.53-3.66 (m, 1H), 3.52 (dd, J = 9.5, 2.4 Hz, 0.5H), 2.56-2.68 (m, 2H), 1.72-1.88 (m, 2H); <sup>13</sup>C NMR (75 MHz, CDCl<sub>3</sub>)  $\delta$  171.3, 171.1, 156.3, 142.0, 141.9, 138.2, 136.5, 128.8, 128.6, 128.4, 128.3, 126.1, 117.9, 117.8, 81.3, 81.1, 68.6, 68.2, 67.3, 54.7, 52.7, 37.2, 36.9, 31.6; HRMS (EI-MS) Calcd for C<sub>23</sub>H<sub>27</sub>O<sub>5</sub>N [(M-Bn)+] 306.1341, Found 306.1334.

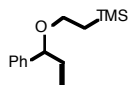

**1-(2-Trimethylsilylethanoxy)-1-phenyl-2-propene (3di).** Following method A, **1d** (120 mg, 0.50 mmol), **2i** (65 mg, 0.55 mmol), [Ir(COD)Cl]<sub>2</sub> (8.4 mg, 0.012 mmol), pyridine (2.6  $\mu$ L, 0.025 mmol), Et<sub>2</sub>Zn (1.0 M in hexanes, 0.28 mL, 0.28 mmol) and NH<sub>4</sub>I (72 mg, 0.50 mmol) were reacted in THF (0.50 mL, 1.0 M) to afford **3di** (40 mg, 0.17 mmol, 34%) as a clear, colorless oil after column chromatography (hexanes:diethyl ether = 40:1). Following method B, **1d** (120 mg, 0.50 mmol), **2i** (89 mg, 0.75 mmol), [Ir(COD)Cl]<sub>2</sub> (8.4 mg, 0.012 mmol), pyridine (2.6  $\mu$ L, 0.025

mmol), Et<sub>2</sub>Zn (1.0 M in hexanes, 50  $\mu$ L, 0.50 mmol), L-tryptophan (10 mg, 0.050 mmol) and NH<sub>4</sub>I (7.3 mg, 0.050 mmol) were reacted in THF (0.50 mL, 1.0 M) to afford **3di** (85 mg, 0.36 mmol, 73%). IR (film) 3029, 2953, 2892, 1249, 1067, 860, 838, 700 cm<sup>-1</sup>; <sup>1</sup>H NMR (300 MHz, CDCl<sub>3</sub>)  $\delta$  5.95 (ddd, J = 17.1, 10.2, 6.7 Hz, 1H), 5.28 (dt, J = 17.2, 1.4 Hz, 1H), 5.19 (dt, J = 10.3, 1.4 Hz, 1H), 4.75 (d, J = 6.7 Hz, 1H), 3.45-3.63 (m, 2H), 1.01 (t, J = 8.3 Hz, 2H), 0.02 (s, 9H); <sup>13</sup>C NMR (75 MHz, CDCl<sub>3</sub>)  $\delta$  141.7, 139.6, 128.6, 127.7, 127.0, 116.0, 82.9, 66.0, 18.5, -1.0; HRMS (EI-MS) Calcd for C<sub>14</sub>H<sub>22</sub>OSi [(M-H)+] 233.1362, Found 233.1369.

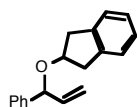

**1-(2-Indanoxyl)-1-phenyl-2-propene (3dj).** Following method A, **1d** (120 mg, 0.50 mmol), **2j** (74 mg, 0.55 mmol), [Ir(COD)Cl]<sub>2</sub> (8.4 mg, 0.012 mmol), pyridine (2.6  $\mu$ L, 0.025 mmol), Et<sub>2</sub>Zn (1.0 M in hexanes, 0.28 mL, 0.28 mmol) and NH<sub>4</sub>I (72 mg, 0.50 mmol) were reacted in THF (0.5 mL, 1.0 M) to afford **3dj** (78 mg, 0.31 mmol, 62%) as a clear, colorless oil after column chromatography (hexanes:diethyl ether = 40:1). Following method B, **1d** (120 mg, 0.50 mmol), **2j** (100 mg, 0.75 mmol), [Ir(COD)Cl]<sub>2</sub> (8.4 mg, 0.012 mmol), pyridine (2.6  $\mu$ L, 0.025 mmol), Et<sub>2</sub>Zn (1.0 M in hexanes, 50  $\mu$ L, 0.050 mmol), L-tryptophan (10 mg, 0.050 mmol) and NH<sub>4</sub>I (7.3 mg, 0.050 mmol) were reacted in THF (0.50 mL, 1.0 M) to afford **3dj** (100 mg, 0.40 mmol, 80%). IR (film) 3066, 3025, 2941, 2906, 2845, 1739, 1483, 1305, 1088, 1058, 926, 743, 701 cm<sup>-1</sup>; <sup>1</sup>H NMR (300 MHz, CDCl<sub>3</sub>)  $\delta$  7.16-7.43 (m, 9H), 6.02 (ddd, J = 17.0, 10.3, 6.6 Hz, 1H), 5.32 (dt, J = 17.1, 1.4 Hz, 1H), 5.24 (dt, J = 10.2, 1.3 Hz, 1H), 4.96 (d, J = 6.6 Hz, 1H), 4.50 (quint, J = 5.6 Hz, 1H), 2.97-3.29 (m, 4H); <sup>13</sup>C NMR (75 MHz, CDCl<sub>3</sub>)  $\delta$  141.6, 141.2, 139.6, 128.7, 127.9, 127.2, 126.7, 124.9, 116.4, 81.6, 78.2, 39.8, 39.7; HRMS (FAB-MS) Calcd for C<sub>18</sub>H<sub>18</sub>O [MNa<sup>+</sup>] 273.1255, Found 273.1245.

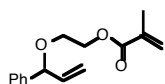

**2-(1-Phenyl-2-propenoxy)-ethyl 2-methylpropenoate (3dk).** Following method A, **1d** (120 mg, 0.50 mmol), **2k** (72 mg, 0.55 mmol), [Ir(COD)Cl]<sub>2</sub> (8.4 mg, 0.012 mmol), pyridine (2.6  $\mu$ L, 0.025 mmol), Et<sub>2</sub>Zn (1.0 M in hexanes, 0.28 mL, 0.28 mmol) and NH<sub>4</sub>I (72 mg, 0.50 mmol) were reacted in THF (0.50 mL, 1.0 M) to afford **3dk** (71 mg, 0.29 mmol, 58%) as a clear, colorless oil after column chromatography (hexanes:diethyl ether = 25:1). Following method B, **1d** (120 mg, 0.50 mmol), **2k** (98 mg, 0.75 mmol), [Ir(COD)Cl]<sub>2</sub> (8.4 mg, 0.012 mmol), pyridine (2.6  $\mu$ L, 0.025 mmol), Et<sub>2</sub>Zn (1.0 M in hexanes, 50  $\mu$ L, 0.050 mmol), L-tryptophan (10 mg, 0.050 mmol) and NH<sub>4</sub>I (7.3 mg, 0.050 mmol) were reacted in THF (0.50 mL, 1.0 M) to afford **3dk** (90 mg, 0.36 mmol, 73%). IR (film) 2926, 1720, 1452, 1296, 1169, 1101, 701 cm<sup>-1</sup>; <sup>1</sup>H NMR (300 MHz, CDCl<sub>3</sub>)  $\delta$  7.26-7.36 (m, 5H), 6.15 (s, 1H), 5.95 (ddd, J = 17.2, 10.3, 6.5 Hz, 1H), 5.58 (s, 1H), 5.29 (d, J = 17.2 Hz, 1H), 5.21 (d, J = 10.3 Hz, 1H), 4.81 (d, J = 6.5 Hz, 1H), 4.33 (t, J = 4.7 Hz, 2H), 3.62-3.77 (m, 2H), 1.97 (s, 3H); <sup>13</sup>C NMR (75 MHz, CDCl<sub>3</sub>)  $\delta$  167.6, 140.9, 138.9, 136.5, 128.7, 128.0, 127.0, 125.9, 116.7, 83.4, 66.5, 64.2, 18.6; HRMS (FAB-MS) Calcd for C<sub>15</sub>H<sub>18</sub>O<sub>3</sub> [MNa<sup>+</sup>] 269.1154, Found 269.1166.

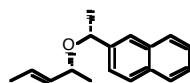

**(2R,1'R)-2-[1'-(2''-naphthyl)ethoxy]-3-pentene (3el)**. Following method A, (*S*)-**1e**<sup>3</sup> (37 mg, 0.20 mmol), (*R*)-**2l** (38 mg, 0.22 mmol), [Ir(COD)Cl]<sub>2</sub> (3.4 mg, 0.0051 mmol), pyridine (0.90  $\mu$ L, 0.010 mmol), Et<sub>2</sub>Zn (1.0 M in hexanes, 0.11 mL, 0.11 mmol) and NH<sub>4</sub>I (29 mg, 0.20 mmol) were reacted in THF (0.20 mL, 1.0 M) to afford **3el** (45 mg, 0.19 mmol, 94%) as a clear, colorless oil after column chromatography (hexanes:diethyl ether = 30:1). No reaction was observed using method B. Carbonate **1e** was recovered quantitatively.  $[\alpha]_D^{23} +0.319$  (*c* 0.55, CHCl<sub>3</sub>); IR (film) 3056, 2973, 2928, 2867, 1449, 1367, 1308, 1087, 966, 856, 818, 747 cm<sup>-1</sup>; <sup>1</sup>H NMR (300 MHz, CDCl<sub>3</sub>)  $\delta$  1.27 (d, *J*=6.3 Hz, 3H), 1.51 (d, *J*=6.4 Hz, 3H), 1.63 (d, *J*=6.4 Hz, 3H), 3.92 (qu, *J*=6.3 Hz, 1H), 4.73 (q, *J*=6.4 Hz, 1H), 5.42 (ddqu, *J*=15.4, 6.4, 1.0 Hz, 1H), 5.55 (ddqu, *J*=15.4, 6.3, 0.8 Hz, 1H), 7.42-7.76 (m, 4H), 7.81-7.86 (m, 3H); <sup>13</sup>C NMR (75 MHz, CDCl<sub>3</sub>)  $\delta$  17.9, 20.7, 23.9, 73.5, 124.8, 125.1, 125.8, 126.2, 126.6, 127.9, 128.1, 128.3, 133.1, 133.5, 134.0, 142.4; HRMS (DEI-MS) Calcd for C<sub>17</sub>H<sub>20</sub>O [M<sup>+</sup>] 240.1512, Found 240.1514.

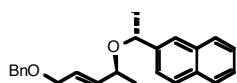

**(4S,1'R)-1-Benzoyloxy-4-[1'-(2''-naphthyl)ethoxy]-2-pentene (3fl)**. Following method A, (*S*)-**1f**<sup>4</sup> (120 mg, 0.40 mmol), (*R*)-**2l** (76 mg, 0.44 mmol), [Ir(COD)Cl]<sub>2</sub> (6.7 mg, 0.010 mmol), pyridine (1.9  $\mu$ L, 0.020 mmol), Et<sub>2</sub>Zn (1.0 M in hexanes, 0.22 mL, 0.22 mmol) and NH<sub>4</sub>I (58 mg, 0.40 mmol) were reacted in THF (0.40 mL, 1.0 M) to afford **3fl** (73 mg, 0.21 mmol, 52%) as a clear, yellow oil after column chromatography (hexanes:diethyl ether = 20:1). No reaction was observed using method B. Carbonate **1f** was recovered quantitatively.  $[\alpha]_D^{23} +0.260$  (*c* 1.025, CHCl<sub>3</sub>); IR (film) 3542, 2981, 2957, 2935, 2874, 1732, 1662, 1438, 1372, 1282, 1176, 1136, 1097, 899, 709 cm<sup>-1</sup>; <sup>1</sup>H NMR (300 MHz, CDCl<sub>3</sub>)  $\delta$  1.34 (d, *J*=6.3 Hz, 3H), 1.54 (d, *J*=6.4 Hz, 3H), 3.97 (d, *J*=4.7 Hz, 2H), 4.04 (qu, *J*=4.2 Hz, 1H), 4.44 (s, 2H), 4.77 (q, *J*=6.4 Hz, 1H), 5.65-5.74 (m, 2H), 7.29-7.39 (m, 5H), 7.46-7.53 (m, 3H), 7.78-7.85 (m, 4H); <sup>13</sup>C NMR (75 MHz, CDCl<sub>3</sub>)  $\delta$  20.8, 24.1, 70.5, 72.2, 73.2, 75.1, 124.7, 125.1, 125.9, 126.3, 127.3, 127.8, 127.9, 128.0, 128.1, 128.4, 128.6, 133.2, 133.5, 136.0, 138.56, 142.2; HRMS (DEI-MS) Calcd for C<sub>24</sub>H<sub>26</sub>O<sub>2</sub> [M<sup>+</sup>] 346.1929, Found 346.1933.

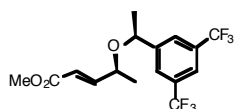

**(4S,1'S)-4-[1'-(3'',5''-bis-trifluoromethylphenyl)ethoxy]-pent-2-enoic acid methyl ester (3gm)**. Following method A, (*S*)-**1g**<sup>5</sup> (46 mg, 0.20 mmol), (*S*)-**2m**<sup>6</sup> (57 mg, 0.22 mmol), [Ir(COD)Cl]<sub>2</sub> (3.4 mg, 0.0051 mmol), pyridine (0.90  $\mu$ L, 0.010 mmol), Et<sub>2</sub>Zn (1.0 M in hexanes, 0.11 mL, 0.11 mmol) and NH<sub>4</sub>I (29 mg, 0.20 mmol) were reacted in THF (0.2 mL, 1.0 M) to afford **3gm** (73 mg, 0.10 mmol, 50%) as a clear, light yellow oil after column chromatography (hexanes:ethyl acetate = 16:1). No reaction was observed using method B. Carbonate **1g** was recovered quantitatively.  $[\alpha]_D^{23} -0.816$  (*c* 0.91, CHCl<sub>3</sub>); IR (film) 3058, 3030, 2973, 2928, 2859,

<sup>3</sup> Solladie, G.; Demailly, G.; Grack, C. *J. Am. Chem. Soc.* **1985**, *50*, 1552.

<sup>4</sup> Mulzer, J.; Salimi, N.; Hartl, H. *Tetrahedron: Asymmetry* **1993**, *4*, 457.

<sup>5</sup> Pickard, S. T.; Smith, H. E. *J. Am. Chem. Soc.* **1990**, *112*, 5741.

<sup>6</sup> Annunziata, R.; Cinquini, M.; Cozzi, F.; Raimondi, L.; Pilati, T. *Tetrahedron: Asymmetry* **1991**, *2*, 1329.

1739, 1453, 1367, 1309, 1089, 970, 820, 747, 698  $\text{cm}^{-1}$ ;  $^1\text{H}$  NMR (300 MHz,  $\text{CDCl}_3$ )  $\delta$  1.25 (d,  $J=6.5$  Hz, 3H), 1.44 (d,  $J=6.5$  Hz, 3H), 3.77 (s, 3H), 3.85 (dqu,  $J=6.3, 0.8$  Hz, 1H), 4.56 (q,  $J=6.5$  Hz, 1H), 5.95 (dd,  $J=15.8, 1.1$  Hz, 1H), 6.86 (dd,  $J=15.8, 6.2$  Hz, 1H), 7.75 (s, 2H), 7.92 (s, 1H);  $^{13}\text{C}$  NMR (75 MHz,  $\text{CDCl}_3$ )  $\delta$  21.4, 24.8, 28.7, 51.9, 73.0, 75.1, 121.3, 121.8, 126.4, 132.0, 132.4, 147.0, 149.2, 166.8; HRMS (DEI-MS) Calcd for  $\text{C}_{16}\text{H}_{16}\text{F}_6\text{O}_3$   $[\text{MH}^+]$  371.1071, Found 371.1082.

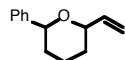

**(*R*\*,*S*\*)-2-Phenyl-6-vinyl-tetrahydro-pyran (6).** Following method A, hydroxycarbonate **5**<sup>7</sup> (61 mg, 0.20 mmol),  $[\text{Ir}(\text{COD})\text{Cl}]_2$  (3.4 mg, 0.0051 mmol), pyridine (0.90  $\mu\text{L}$ , 0.010 mmol),  $\text{Et}_2\text{Zn}$  (1.0 M in hexanes, 0.11 mL, 0.11 mmol) and  $\text{NH}_4\text{I}$  (29 mg, 0.20 mmol) were reacted in THF (0.20 mL, 1.0 M) to afford the known tetrahydropyran **6**<sup>5,8</sup> (36 mg, 0.19 mmol, 96%) as a clear, colorless oil after column chromatography (hexanes:diethyl ether = 40:1). Following method B, **5** (61.3 mg, 0.200 mmol),  $[\text{Ir}(\text{COD})\text{Cl}]_2$  (3.4 mg, 0.0051 mmol), pyridine (0.9  $\mu\text{L}$ , 0.01 mmol),  $\text{Et}_2\text{Zn}$  (1.0 M in hexanes, 20  $\mu\text{L}$ , 0.020 mmol), L-tryptophan (4.1 mg, 0.020 mmol) and  $\text{NH}_4\text{I}$  (2.9 mg, 0.20 mmol) were reacted in THF (0.2 mL, 1.0 M) to afford **6** (19.0 mg, 0.101 mmol, 50%). Obtained as a 1:1 mixture of diastereomers.  $^1\text{H}$  NMR (300 MHz,  $\text{CDCl}_3$ )  $\delta$  7.20-7.46 (m, 5H), 5.9-6.1 (m, 1H), 5.34 (dt,  $J = 7.2, 1.7$  Hz, 0.5H), 5.23-5.31 (m, 1H), 5.12 (dt,  $J = 10.6, 1.7$  Hz, 0.5H), 4.82 (dd,  $J = 7.0, 3.8$  Hz, 0.5H), 4.41-4.46 (m, 1H), 4.0-4.09 (m, 0.5H), 1.39-2.04 (m, 6H);  $^{13}\text{C}$  NMR (75 MHz,  $\text{CDCl}_3$ )  $\delta$  143.6, 142.9, 139.7, 138.8, 128.6, 128.4, 127.4, 127.3, 126.5, 126.1, 116.4, 114.6, 80.0, 78.9, 73.1, 73.0, 33.9, 31.9, 31.5, 28.9, 24.2, 19.4.

#### Procedure for stereochemical analysis of **3bd** from the reaction of (*S*)-**1b** with **2d**.<sup>9,10</sup>

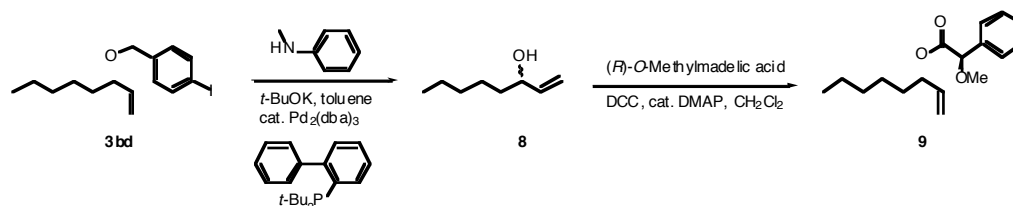

To a solution of *p*-iodobenzylether **3bd** (69 mg, 0.20 mmol),  $\text{Pd}_2(\text{dba})_3$  (9.2 mg, 0.010 mmol) and biphenyl-di-*tert*-butylphosphine (12 mg, 0.040 mmol) in toluene (0.40 mL, 0.5 M) at room temperature was added *N*-methylaniline (26  $\mu\text{L}$ , 0.24 mmol). The resulting mixture was allowed to stir for 5 min at which time potassium *tert*-butoxide was added. After stirring for 30 min, trifluoroacetic acid (50  $\mu\text{L}$ ) was added, the reaction mixture was diluted with diethyl ether (20 mL) and washed with a saturated, aqueous  $\text{NaHCO}_3$  solution (5 mL). The aqueous layer was extracted with additional diethyl ether (10 mL). The combined organic layers were dried with  $\text{MgSO}_4$ , filtered, and concentrated to afford crude 1-octen-3-ol (**7**, 16 mg, 0.13 mmol, 65%), which was carried on to the next reaction without further purification.

<sup>7</sup> (a) Barrett, A. G. M.; Flygare, J. A.; Spilling, C. D. *J. Org. Chem.* **1989**, *54*, 4723-4726. (b) Kim, H.; Lee, C. *Org. Lett.* **2002**, *4*, 4369.

<sup>8</sup> Brown, D. S.; Bruno, M.; Davenport, R. J.; Ley, S. V. *Tetrahedron* **1989**, *45*, 4293.

<sup>9</sup> Plante, O. J.; Buchwald, S. L.; Seeberger, P. H. *J. Am. Chem. Soc.* **2000**, *122*, 7148.

<sup>10</sup> (a) Dale, J. A.; Mosher, H. S. *J. Am. Chem. Soc.* **1968**, *90*, 3732. (b) Trost, B. M.; Belletrie, J. L.; Godleski, S.; McDougal, P. G.; Balkovec, J. M.; Baldwin, J. J.; Christy, M. E.; Ponticello, G. S.; Varga, S. L.; Springer, J. P. *J. Org. Chem.* **1986**, *51*, 2370.



To a solution of 1-octen-3-ol (**8**, 16 mg, 0.13 mmol) from the previous deprotection, (*R*)-*O*-methylmandelic acid (32 mg, 0.19 mmol) and 4-(*N,N*-dimethylamino)pyridine (1.6 mg, 0.013 mmol) in CH<sub>2</sub>Cl<sub>2</sub> at 0 °C was added dicyclohexylcarbodiimide (1 M in CH<sub>2</sub>Cl<sub>2</sub>, 0.19 mL, 0.19 mmol). The resulting mixture was allowed to stir for 1 h, diluted with CH<sub>2</sub>Cl<sub>2</sub> (20 mL) and washed with water (10 mL). The aqueous layers were extracted with additional CH<sub>2</sub>Cl<sub>2</sub> (10 mL). The combined organic layers were washed with saturated, aqueous NaHCO<sub>3</sub> solution (10 mL), dried with MgSO<sub>4</sub>, filtered, concentrated and purified by flash chromatography eluting with a mixture of hexanes and diethyl ether (10:1) to give the *O*-methylmandelate ester **9** as a 3.7:1 mixture of diastereomers (35 mg, 100%), as determined by comparison of its <sup>1</sup>H NMR spectrum with those of the (*R*)-*O*-methylmandelate esters prepared from racemic and enantiomerically pure (*S*)-configured forms of 1-octen-3-ol (**8**), respectively.

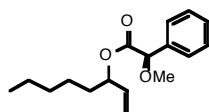

**(±)-1-Octen-3-yl (*R*)-*O*-methylmandelate (a 1:1 mixture of diastereomers) (*RS,R*-9).** IR (film) 2932, 2860, 2828, 1750, 1734, 1456, 1252, 1199, 1176, 1116, 999, 928, 733, 697 cm<sup>-1</sup>; <sup>1</sup>H NMR (300 MHz, C<sub>6</sub>D<sub>6</sub>) δ 7.59-7.20 (m, 4H), 7.09-7.20 (m, 6H), 5.54-5.75 (m, 2H), 5.43 (qu, *J* = 6.4 Hz, 2H), 5.18 (dt, *J* = 17.3, 1.4 Hz, 1H), 5.04 (dt, *J* = 17.3, 1.4 Hz, 1H), 5.00 (dt, *J* = 10.5, 1.2 Hz, 1H), 4.91 (dt, *J* = 10.5, 1.2 Hz, 1H), 4.78 (s, 1H), 4.74 (s, 1H), 3.25 (s, 6H), 0.80-1.60 (m, 22H); <sup>13</sup>C NMR (75 MHz, C<sub>6</sub>D<sub>6</sub>) δ 169.8, 137.5, 136.8, 136.5, 116.4, 116.4, 83.4, 83.2, 75.1, 57.1, 34.4, 34.3, 31.7, 31.6, 24.9, 24.7, 22.7, 14.1; HRMS (ESI-TOF-MS) Calcd for C<sub>17</sub>H<sub>24</sub>O<sub>3</sub> [MNa<sup>+</sup>] 299.1618, Found 299.1618.

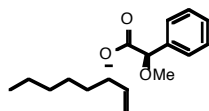

**(*S*)-1-Octen-3-yl (*R*)-*O*-methylmandelate (*S,R*-9).** [ $\alpha$ ]<sub>D</sub><sup>23</sup> -0.282 (*c* 0.91, CH<sub>2</sub>Cl<sub>2</sub>); IR (film) 2932, 2858, 2119, 1750, 1455, 1359, 1255, 1199, 1175, 1117, 1001, 928, 734, 697 cm<sup>-1</sup>; <sup>1</sup>H NMR (300 MHz, C<sub>6</sub>D<sub>6</sub>) δ 7.60-7.64 (m, 2H), 7.06-7.20 (m, 3H), 5.59 (ddd, *J* = 17.0, 10.5, 6.1 Hz, 1H), 5.43 (qt, *J* = 5.9, 1.3 Hz, 1H), 5.04 (dt, *J* = 17.2, 1.3 Hz, 1H), 4.87 (dt, *J* = 10.5, 1.2 Hz, 1H), 4.78 (s, 1H), 3.25 (s, 3H), 1.55-1.69 (m, 2H), 1.15-1.50 (m, 6H), 0.85 (t, *J* = 6.5 Hz, 3H); <sup>13</sup>C NMR (75 MHz, C<sub>6</sub>D<sub>6</sub>) δ 169.8, 137.5, 136.5, 116.3, 83.4, 75.1, 57.0, 55.7, 35.3, 34.4, 31.7, 25.7, 24.9, 24.8, 22.8, 14.1; HRMS (ESI-TOF-MS) Calcd for C<sub>17</sub>H<sub>24</sub>O<sub>3</sub> [MNa<sup>+</sup>] 299.1618, Found 299.1616.
